# Supplementary material for: In V4, pair-wise synchrony and correlations depend on the structure of the population code
Source: bioRxiv or medRxiv preprint supplement (doi:10.1101/645135), 2020-03-11
Supplement: Supplementary file [file media-2.pdf]

## Supplementary fig. 2: Area under the ROC curve and feature weights of the linear SVM during target time window.

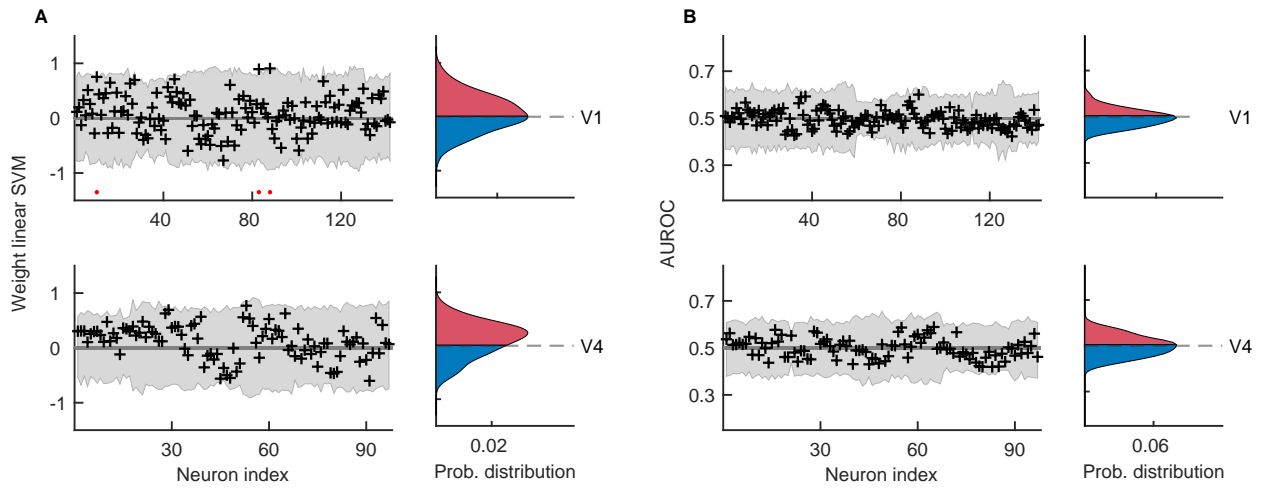

**A)** Left: Feature weights of the linear SVM during target (black). Weights have been collected across recording sessions. The gray area shows the distribution of weights of models with permuted class labels ( $nperm = 1000$ ). Right: Population weights, pooled across neurons from all recording session. **B)** Left: *AUROC* scores during target time window (black) in V1 (top) and V4 (bottom). The gray area indicates the distribution of results for models with permuted class labels ( $nperm = 1000$ ). Right: *AUROC* scores, pooled across neurons. The asterisk marks significance of the deviation of the distribution from 0.5 (permutation test,  $nperm = 1000$ ).
