# Supplementary material for: In V4, pair-wise synchrony and correlations depend on the structure of the population code
Source: bioRxiv or medRxiv preprint supplement (doi:10.1101/645135), 2020-03-11
Supplement: Supplementary file [file media-3.pdf]

**Supplementary fig. 3: Single neuron and pair-wise statistics for groups of informative and uninformative neurons during target time window.**

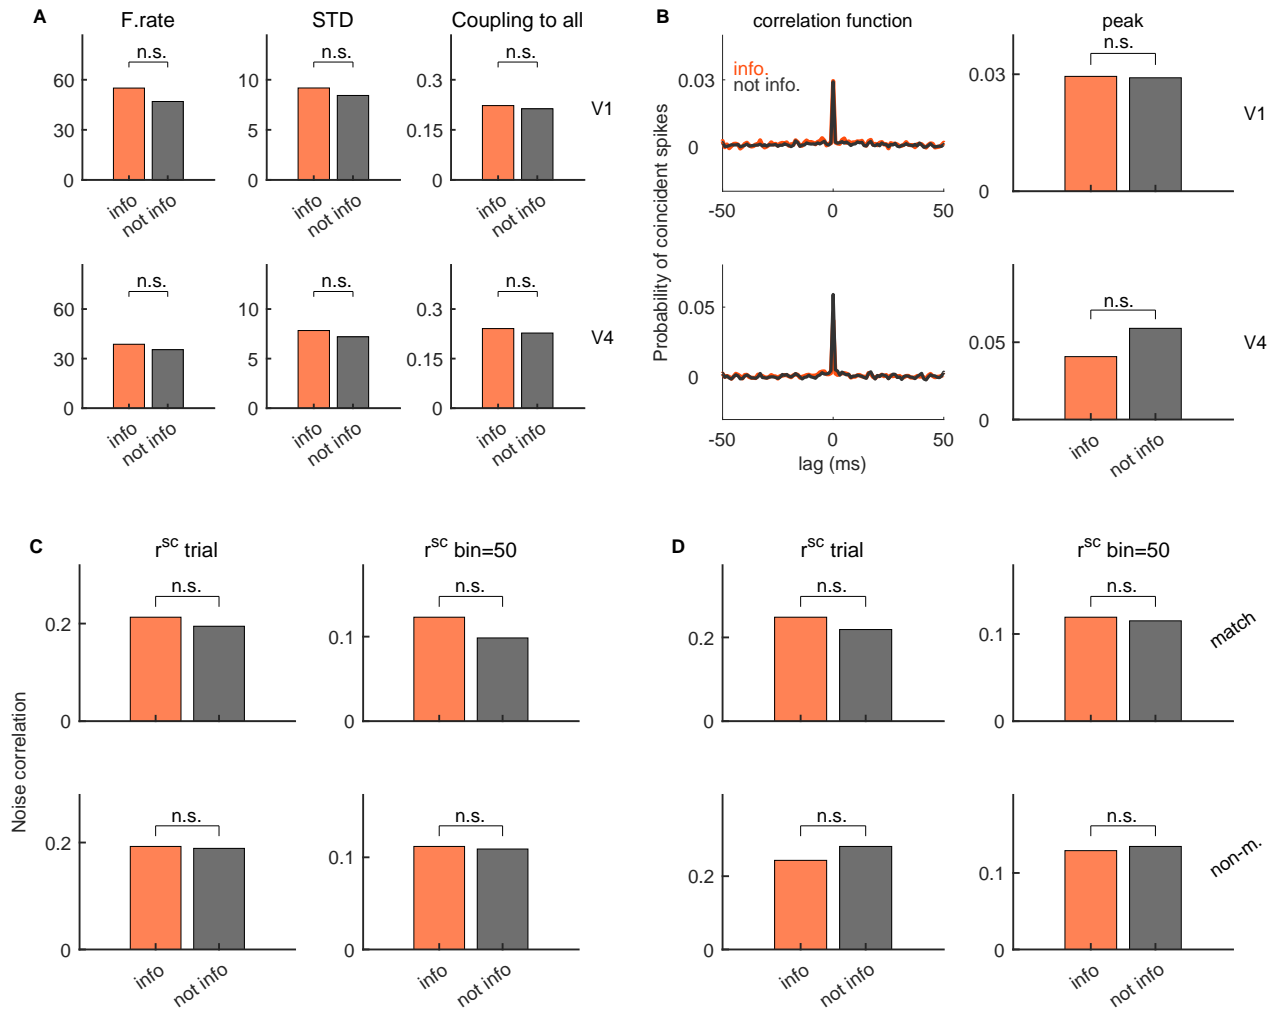

**A)** The firing rate (left), the STD of spike counts (middle) and the coefficient of coupling to the population for informative (orange) and uninformative (dark gray) neurons. Results are for the target time window in V1 (top) and in V4 (bottom). **B)** Left: Correlation function for informative and uninformative neurons during target. Correlation function is averaged across neuronal pairs. Right: Peak of the average correlation function. **C)** Noise correlations for informative and uninformative neurons in condition “match” (top) and “non-match” (bottom) during target in V1. **D)** Same as in **C)**, but in V4. For all panels, we estimated significance with the permutation test ( $nperm = 1000$ ).
