# Supplementary material for: In V4, pair-wise synchrony and correlations depend on the structure of the population code
Source: bioRxiv or medRxiv preprint supplement (doi:10.1101/645135), 2020-03-11
Supplement: Supplementary file [file media-4.pdf]

**Supplementary fig.4: Classification performance and correlation function of neurons with positive and negative weights during target time window.**

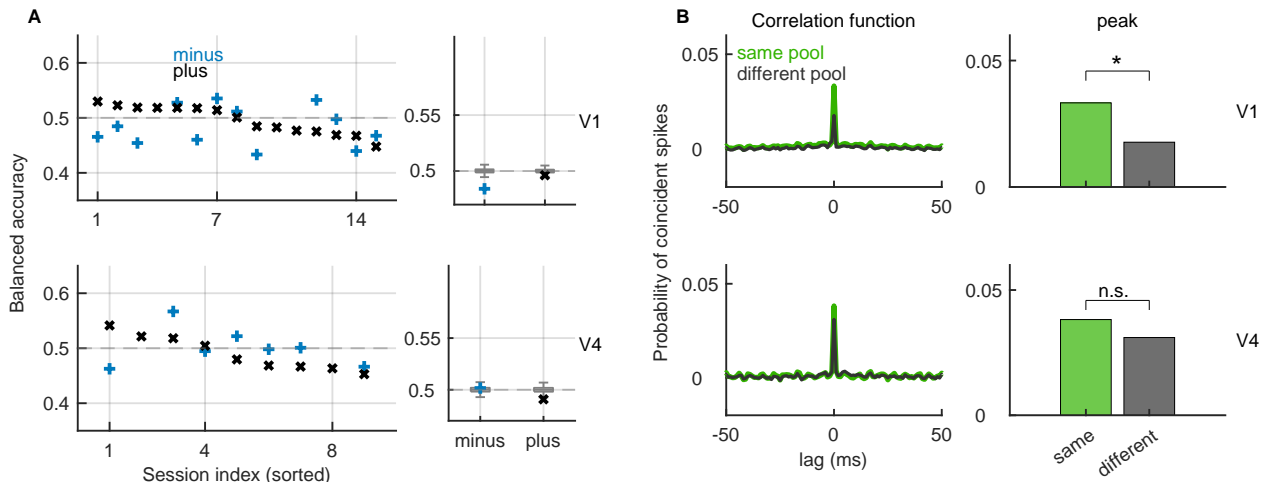

**A)** Left: Classification performance of plus (black) and minus (blue) subnetworks during the target time window. Results are sorted for plus neurons. Right: Session-averaged results and the distribution of results for models with permuted class labels (gray boxplots). **B)** Left: Correlation function for pairs of neurons within coding pools (green) and across coding pools (dark gray) during target. The correlation function is averaged across all measured pairs of neurons. We show results in V1 (top) and in V4 (bottom). Right: Peak of the correlation function, averaged across neurons. Significance is estimated with the permutation test ( $n_{perm} = 1000$ ).
